# Supplementary material for: Distinct transcriptomic profiles in children prior to the appearance of type 1 diabetes-linked islet autoantibodies and following enterovirus infection
Source: PubMed Central journal article supplement (PMC10665402; doi:10.1038/s41467-023-42763-9), 2023-11-22
Supplement: 41467_2023_42763_MOESM3_ESM.pdf [file 41467_2023_42763_MOESM3_ESM.pdf]

## **Description of Additional Supplementary Files**

### Supplementary Data 1

Description: Demographics of TEDDY NCC1 Islet Autoimmunity

### Supplementary Data 2

Description: Differentially expressed genes with their log fold changes and adjusted p-values

### Supplementary Data 3

Description: Enriched pathways for the differentially expressed genes

### Supplementary Data 4

Description: Genes selected with additional temporal criteria

### Supplementary Data 5

Description: Conditional logistic regression results for the selected genes

### Supplementary Data 6

Description: Conditional logistic regression results for the cell types

### Supplementary Data 7

Description: Conditional logistics regression results for viral infections

### Supplementary Data 8

Description: Likelihood Ratio Test Results

### Supplementary Data 9

Description: Viral exposures in subjects in EV analysis

### Supplementary Data 10

Description: Differentially expressed genes at EV infection

### Supplementary Data 11

Description: Enriched pathways at EV infection

### Supplementary Data 12

Description: Differentially expressed genes at hAdV infection

### Supplementary Data 13

Description: Cell type correlation between samples taken before and after EV

### Supplementary Data 14

Description: Conditional logistics results for cell types at EV

### Supplementary Data 15

Description: Accession IDs for external data used in the deconvolution
